# Supplementary material for: Comparative performance of transcriptome assembly methods for non-model organisms
Source: PubMed Central journal article supplement (PMC4964045; doi:10.1186/s12864-016-2923-8), 2016-07-27

# A. Percent identity and contig coverage against the *Aedes albopictus* genomic scaffolds

**Albopictus G.guided VS Albopictus scaffolds**

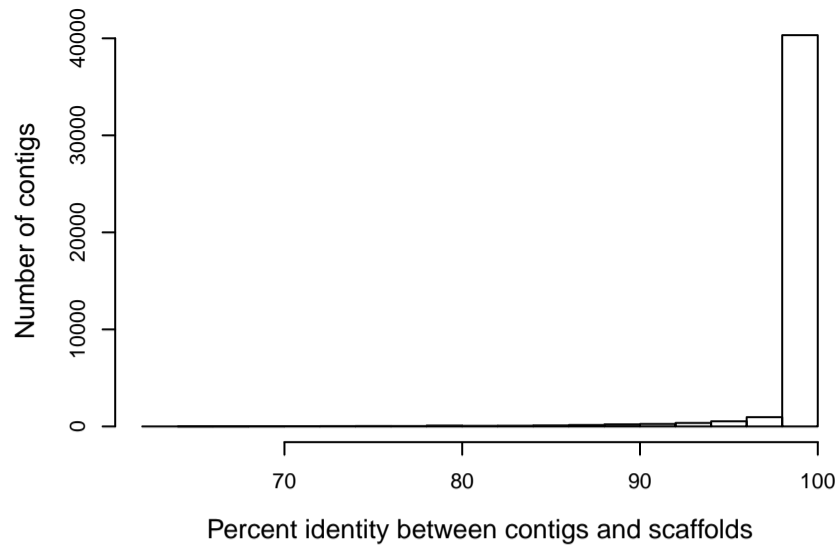

**Aegypti G.guided VS Albopictus scaffolds**

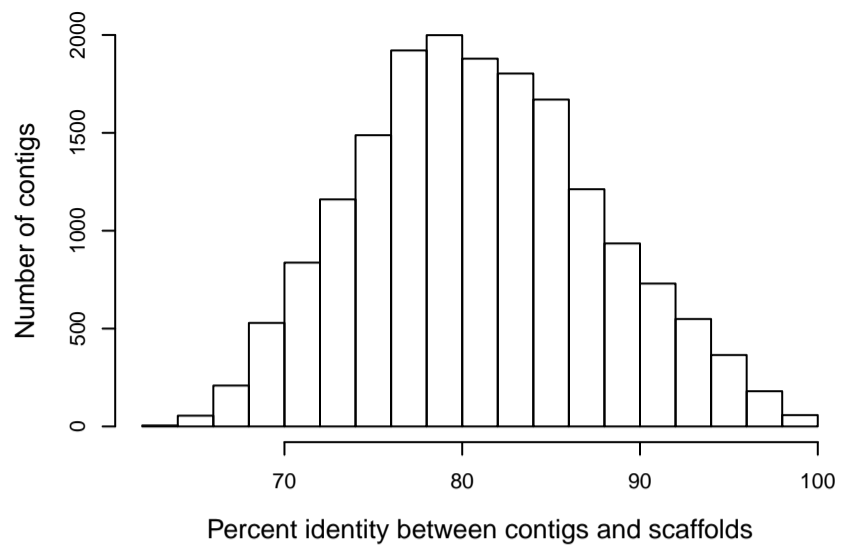

**Albopictus G.guided VS Albopictus scaffolds**

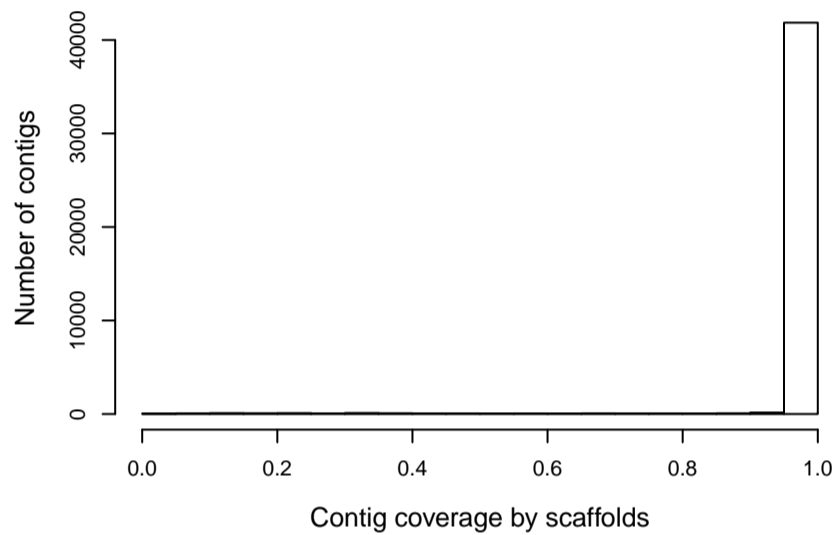

**Aegypti G.guided VS Albopictus scaffolds**

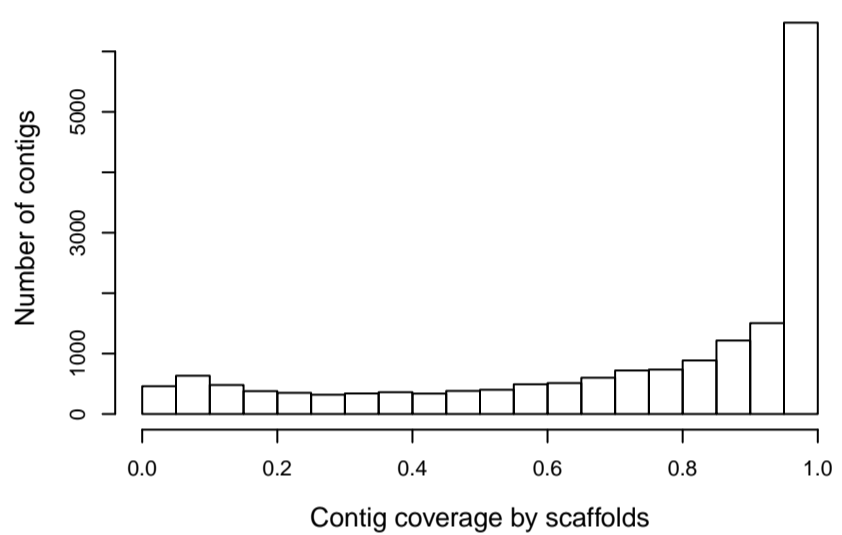

# B. Percent identity and contig coverage against the *Aedes aegypti* genomic scaffolds

**Albopictus G.guided VS Aegypti scaffolds**

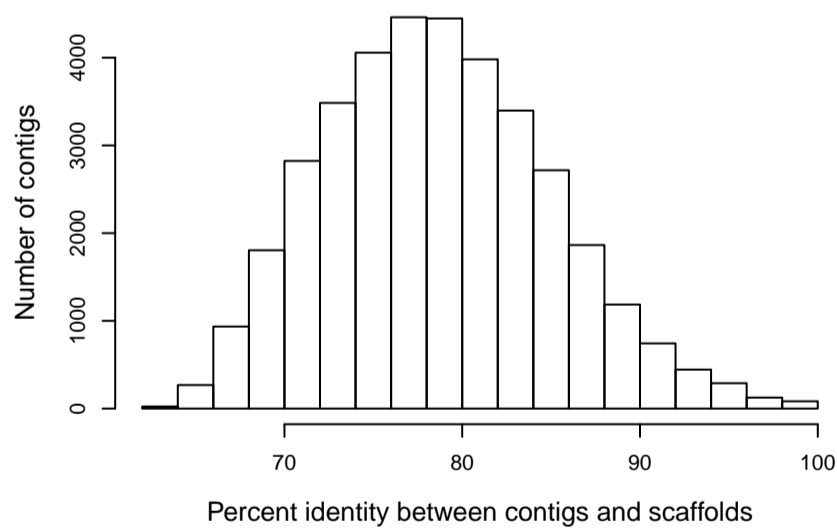

**Aegypti G.guided VS Aegypti scaffolds**

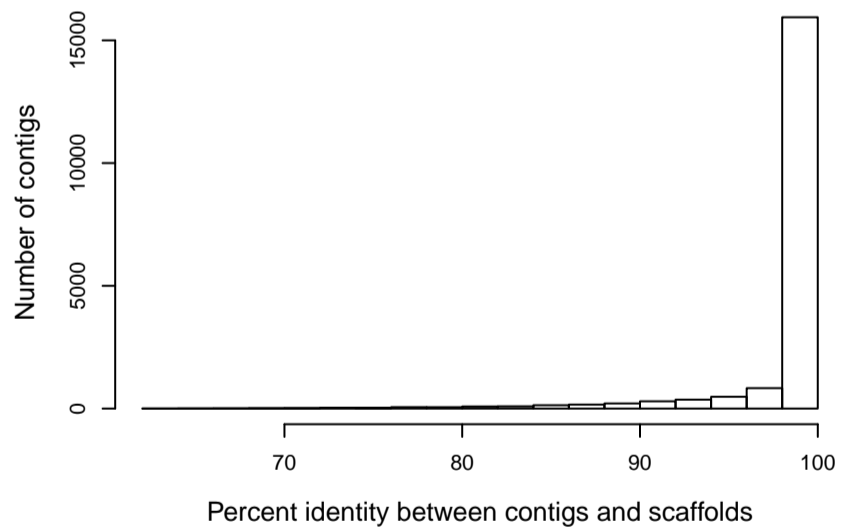

**Albopictus G.guided VS Aegypti scaffolds**

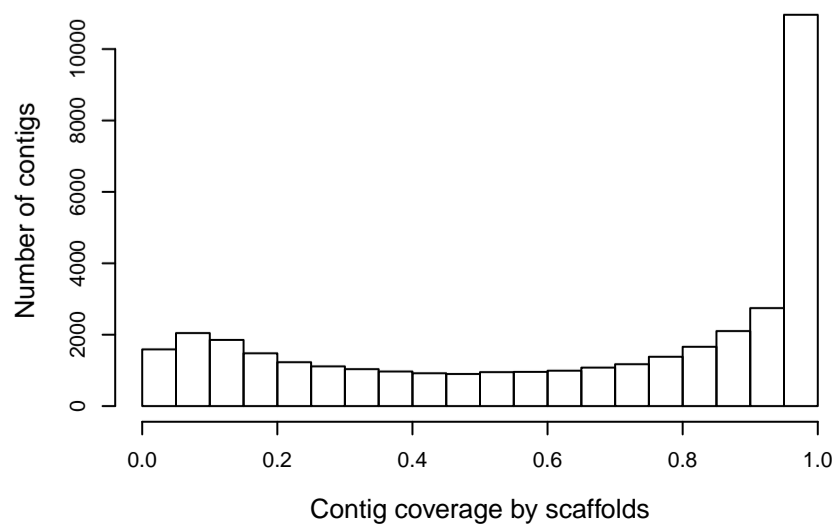

**Aegypti G.guided VS Aegypti scaffolds**

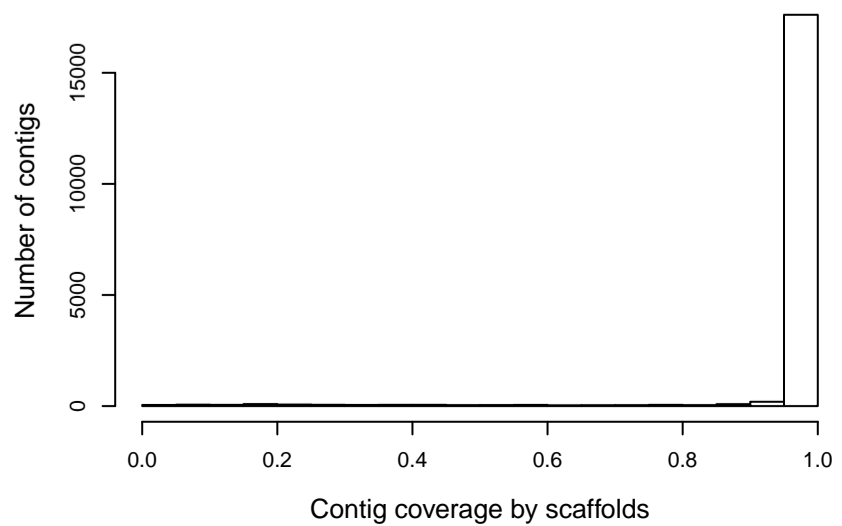

Supplement: 12864_2016_2923_MOESM1_ESM.pdf [file 12864_2016_2923_MOESM1_ESM.pdf]
